# Supplementary material for: Real-World Data Analysis of CDK4/6 Inhibitor Therapy—A Patient-Centric Single Center Study
Source: MDPI journal article supplement (doi:10.3390/cancers16091760), 2024-05-01
Supplement: s1 [file s1]

**Table S1.** Grouping Analyses for PFS, TTF, Treatment benefit  $\geq 4$  and  $\geq 10$  months depending on tumorbiology, metastatic sites and previous treatments (total n = 86).

| Variable                  | N (%)         | PFS                                        | TTF                                       | Treatment Benefit $\geq 4$ months            | Treatment Benefit $\geq 10$ months         |
|---------------------------|---------------|--------------------------------------------|-------------------------------------------|----------------------------------------------|--------------------------------------------|
| <b>Tumorbiology</b>       |               |                                            |                                           |                                              |                                            |
| ER<br>per 10% increase    | 82<br>(95.3%) | HR: 0.852<br>(0.752 – 0.966)<br>p = 0.012  | HR: 0.851<br>(0.767 – 0.944)<br>p = 0.002 | OR: 1.180<br>(0.963 – 1.447)<br>p = 0.110    | OR: 1.351<br>(1.044 – 1.750)<br>p = 0.022  |
| ER<br>per 1% increase     | 82<br>(95.3%) | HR: 0.984<br>(0.972 – 0.997)<br>p = 0.012  | HR: 0.984<br>(0.974 – 0.994)<br>p = 0.002 | OR: 1.017<br>(0.996 – 1.038)<br>p = 0.110    | OR: 1.031<br>(1.004 – 1.058)<br>p = 0.022  |
| PR<br>per 10% increase    | 82<br>(95.3%) | HR: 0.875<br>(0.801 – 0.956)<br>p = 0.003  | HR: 0.885<br>(0.821 – 0.954)<br>p = 0.001 | OR: 1.156<br>(1.016 – 1.315)<br>p = 0.028    | OR: 1.151<br>(1.020 – 1.305)<br>p = 0.023  |
| PR<br>per 1% increase     | 82<br>(95.3%) | HR: 0.987<br>(0.978 – 0.995)<br>p = 0.003  | HR: 0.988<br>(0.980 – 0.995)<br>p = 0.001 | OR: 1.015<br>(1.002 – 1.028)<br>p = 0.028    | OR: 1.014<br>(1.002 – 1.027)<br>p = 0.023  |
| Ki-67<br>per 10% increase | 70<br>(81.4%) | HR: 1.067<br>(0.881 – 1.293)<br>p = 0.504  | HR: 1.129<br>(0.964 – 1.321)<br>p = 0.132 | OR: 0.913<br>(0.700 – 1.191)<br>p = 0.504    | OR: 0.804<br>(0.615 – 1.053)<br>p = 0.113  |
| Ki-67<br>per 1% increase  | 70<br>(81.4%) | HR: 1.007<br>(0.987 – 1.026)<br>p = 0.504  | HR: 1.012<br>(0.996 – 1.028)<br>p = 0.132 | OR: 0.991<br>(0.965 – 1.018)<br>p = 0.504    | OR: 0.978<br>(0.953 – 1.005)<br>p = 0.113  |
| <b>Metastatic site</b>    |               |                                            |                                           |                                              |                                            |
| Bone                      | 71<br>(82.6%) | HR: 1.339<br>(0.590 – 3.037)<br>p = 0.485  | HR: 1.563<br>(0.736 – 3.319)<br>p = 0.245 | OR: 0.669<br>(0.193 – 2.321)<br>p = 0.527    | OR: 0.579<br>(0.186 – 1.798)<br>p = 0.345  |
| Pulmonal/pleural          | 34<br>(39.5%) | HR: 1.617<br>(0.887 – 2.950)<br>p = 0.117  | HR: 1.380<br>(0.819 – 2.324)<br>p = 0.226 | OR: 0.890<br>(0.358 – 2.215)<br>p = 0.803    | OR: 0.731<br>(0.307 – 1.742)<br>p = 0.480  |
| Hepatic                   | 27<br>(31.4%) | HR: 3.175<br>(1.726 – 5.840)<br>p = 0.0002 | HR: 2.379<br>(1.399 – 4.043)<br>p = 0.001 | OR: 0.317<br>(0.122 – 0.823)<br>p = 0.018    | OR: 0.240<br>(0.088 – 0.656)<br>p = 0.005  |
| Nodal                     | 25<br>(29.1%) | HR: 2.647<br>(1.421 – 4.929)<br>p = 0.002  | HR: 2.057<br>(1.201 – 3.522)<br>p = 0.009 | OR: 0.416<br>(0.160 – 1.097)<br>p = 0.077    | OR: 0.289<br>(0.105 – 0.793)<br>p = 0.016  |
| Skin                      | 7 (8.1%)      | HR: 0.983<br>(0.302 – 3.196)<br>p = 0.977  | HR: 0.988<br>(0.356 – 2.739)<br>p = 0.981 | OR: 3.294<br>(0.377 – 28.747)<br>p = 0.281   | OR: 0.769<br>(0.162 – 3.663)<br>p = 0.742  |
| Brain                     | 6 (7.0%)      | HR: 1.031<br>(0.318 – 3.348)<br>p = 0.959  | HR: 1.024<br>(0.370 – 2.836)<br>p = 0.964 | OR: 1.019<br>(0.175 – 5.919)<br>p = 0.983    | OR: 0.500<br>(0.087 – 2.886)<br>p = 0.438  |
| Peritoneal                | 3 (3.5%)      | HR: 0.997<br>(0.240 – 4.138)<br>p = 0.997  | HR: 1.147<br>(0.358 – 3.678)<br>p = 0.818 | OR: > 999.9<br>(<0.01– > 999.9)<br>p = 0.978 | OR: 2.150<br>(0.188 – 24.633)<br>p = 0.539 |
| Other                     | 10<br>(11.6%) | HR: 0.803<br>(0.337 – 1.913)<br>p = 0.620  | HR: 0.715<br>(0.323 – 1.583)<br>p = 0.408 | OR: 5.250<br>(0.631 – 43.647)<br>p = 0.125   | OR: 1.667<br>(0.435 – 6.383)<br>p = 0.4556 |
| Bone-only                 | 21<br>(24.4%) | HR: 0.331<br>(0.139 – 0.788)               | HR: 0.343<br>(0.162 – 0.725)              | OR: 3.999<br>(1.069 – 14.958)                | OR: 3.519<br>(1.210 – 10.233)              |

|                                                   |               |                                            |                                           |                                           |                                           |
|---------------------------------------------------|---------------|--------------------------------------------|-------------------------------------------|-------------------------------------------|-------------------------------------------|
|                                                   |               | p = 0.012                                  | p = 0.005                                 | p = 0.039                                 | p = 0.021                                 |
| Visceral                                          | 52<br>(60.5%) | HR: 2.246<br>(1.166 – 4.325)<br>p = 0.016  | HR: 2.229<br>(1.261 – 3.938)<br>p = 0.006 | OR: 0.454<br>(0.173 – 1.194)<br>p = 0.110 | OR: 0.419<br>(0.173 – 1.017)<br>p = 0.055 |
| <b>Previous treatment at any time</b>             |               |                                            |                                           |                                           |                                           |
| Operation                                         | 61<br>(70.9%) | HR: 1.860<br>(0.910 – 3.802)<br>p = 0.089  | HR: 2.079<br>(1.095 – 3.948)<br>p = 0.025 | OR: 0.522<br>(0.182 – 1.497)<br>p = 0.226 | OR: 0.418<br>(0.160 – 1.093)<br>p = 0.075 |
| Mastectomy                                        | 33<br>(38.4%) | HR: 1.742<br>(0.947 – 3.205)<br>p = 0.074  | HR: 1.764<br>(1.045 – 2.978)<br>p = 0.034 | OR: 0.345<br>(0.137 – 0.872)<br>p = 0.024 | OR: 0.438<br>(0.179 – 1.070)<br>p = 0.070 |
| Axillary Dissection                               | 39<br>(45.4%) | HR: 1.387<br>(0.760 – 2.532)<br>p = 0.287  | HR: 1.233<br>(0.734 – 2.072)<br>p = 0.428 | OR: 0.679<br>(0.276 – 1.667)<br>p = 0.398 | OR: 0.822<br>(0.351 – 1.923)<br>p = 0.651 |
| Chemotherapy                                      | 71<br>(82.6%) | HR: 2.151<br>(1.027 – 4.502)<br>p = 0.042  | HR: 1.906<br>(1.025 – 3.544)<br>p = 0.042 | OR: 0.762<br>(0.285 – 2.036)<br>p = 0.588 | OR: 0.433<br>(0.170 – 1.103)<br>p = 0.079 |
| Radiotherapy                                      | 59<br>(68.6%) | HR: 3.642<br>(1.118 – 11.869)<br>p = 0.032 | HR: 2.752<br>(1.093 – 6.930)<br>p = 0.032 | OR: 0.669<br>(0.193 – 2.321)<br>p = 0.527 | OR: 0.410<br>(0.127 – 1.323)<br>p = 0.136 |
| Antihormonal<br>Therapy during<br>primary disease | 47<br>(54.7%) | HR: 1.586<br>(0.555 – 4.531)<br>p = 0.389  | HR: 1.012<br>(0.469 – 2.180)<br>p = 0.976 | OR: 1.176<br>(0.291 – 4.762)<br>p = 0.382 | OR: 1.884<br>(0.433 – 8.190)<br>p = 0.941 |
| Tam<br>(vs. AI upfront)                           | 18<br>(21.4%) | HR: 1.547<br>(0.585 – 4.091)<br>p = 0.379  | HR: 1.292<br>(0.566 – 2.950)<br>p = 0.543 | OR: 0.786<br>(0.188 – 3.290)<br>p = 0.741 | OR: 0.533<br>(0.133 – 2.141)<br>p = 0.375 |
| Tam/AI-<br>combination<br>(vs. AI upfront )       | 12<br>(14.3%) | HR: 2.842<br>(1.000 – 8.075)<br>p = 0.050  | HR: 2.188<br>(0.896 – 5.346)<br>p = 0.086 | OR: 0.700<br>(0.145 – 3.370)<br>p = 0.656 | OR: 0.533<br>(0.133 – 2.141)<br>p = 0.032 |

Abbreviations: ER: estrogen receptor, PR: progesterone receptor, AI: aromatase inhibitor
